# Supplementary material
Source: publisher site journal article supplement (https://www.spandidos-publications.com/3048/downloadSupplementary)

Figure S1. miR-1237 expression after miR-1237 inhibitor transfection was confirmed using real-time RT-PCR.

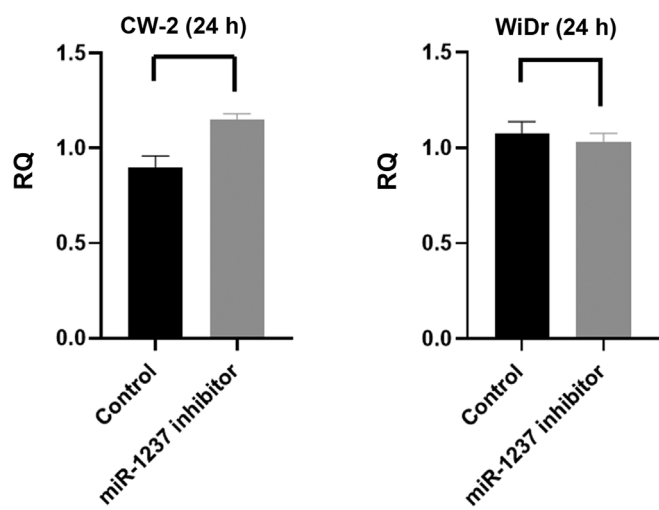

Supplement: Supplementary file 1 [file downloadSupplementary]
